# Supplementary material for: Hepatitis C virus spread from HIV-positive to HIV-negative men who have sex with men
Source: PLoS One. 2018 Jan 2;13(1):e0190340. doi: 10.1371/journal.pone.0190340 (PMC5749770; doi:10.1371/journal.pone.0190340)
Supplement: S1 Table — (DOCX) [file pone.0190340.s001.docx]

Table S1. Genbank accession numbers of sequences reported in the study.

|  | Sequence name | Genbank accession number |
| --- | --- | --- |
| MSM patients | MAH01 | KY928311 |
| MAH02 | KY928312 |
| MAH03 | KY928313 |
| MAH04 | KY928314 |
| MAH05 | KY928315 |
| MAH06 | KY928316 |
| MAH07 | KY928317 |
| MAH08 | KY928318 |
| MAH09 | KY928319 |
| MAH10 | KY928320 |
| MAH11 | KY928321 |
| MAH12 | KY928322 |
| MAH13 | KY928323 |
| MAH14 | KY928324 |
| MAH15 | KY928325 |
| MAH16 | KY928326 |
| MAH17 | KY928327 |
| MAH18 | KY928328 |
| MAH19 | KY928329 |
| MAH20 | KY928330 |
| MAH21 | KY928331 |
| MAH22 | KY928332 |
| MAH23 | KY928333 |
| MAH24 | KY928334 |
| MAH25 | KY928335 |
| MAH26 | KY928336 |
| MAH27 | KY928337 |
| MAH28 | KY928338 |
| MAH29 | KY928339 |
| MAH30 | KY928340 |
| MAH31 | KY928341 |
| MAH32 | KY928342 |
| MAH33 | KY928343 |
| MAH34 | KY928344 |
| MAH35 | KY928345 |
| MAH36 | KY928346 |
| MAH37 | KY928347 |
| MAH38 | KY928348 |
| MAH39 | KY928349 |
| MAH40 | KY928350 |
| MAH41 | KY928351 |
| MAH42 | KY928352 |
| MAH43 | KY928353 |
| MAH44 | KY928354 |
| MAH45 | KY928355 |
| MAH46 | KY928356 |
| MAH47 | KY928357 |
| MAH48 | KY928358 |
| MAH49 | KY928359 |
| Non-MSM patients | NCH101 | KY928360 |
| NCH102 | KY928361 |
| NCH103 | KY928362 |
| NCH104 | KY928363 |
| NCH105 | KY928364 |
| NCH106 | KY928365 |
| NCH107 | KY928366 |
| NCH108 | KY928367 |
| NCH109 | KY928368 |
| NCH110 | KY928369 |
| NCH111 | KY928370 |
| NCH112 | KY928371 |
| NCH113 | KY928372 |
| NCH114 | KY928373 |
| NCH115 | KY928374 |
| NCH116 | KY928375 |
| NCH117 | KY928376 |
| NCH118 | KY928377 |
| NCH119 | KY928378 |
| NCH120 | KY928379 |
| NCH121 | KY928380 |
| NCH122 | KY928381 |
| NCH123 | KY928382 |
| NCH124 | KY928383 |
| NCH125 | KY928384 |
| NCH126 | KY928385 |
| NCH127 | KY928386 |
| NCH128 | KY928387 |
| NCH129 | KY928388 |
| NCH130 | KY928389 |
| NCH401 | KY928390 |
| NCH402 | KY928391 |
| NCH403 | KY928392 |
| NCH404 | KY928393 |
| NCH405 | KY928394 |
| NCH406 | KY928395 |
| NCH407 | KY928396 |
| NCH408 | KY928397 |
| NCH409 | KY928398 |
| NCH410 | KY928399 |
| NCH411 | KY928400 |
| NCH412 | KY928401 |
